# Supplementary material
Source: PubMed Central journal article supplement (PMC2794436)
Supplement: NIHMS155251-supplement-1.pdf [file NIHMS155251-supplement-1.pdf]

| Supplementary Table 1. Circulating cytokine concentrations in heart failure clinical studies.                                                                                                                                                                                           |         |        |              |               |               |              |               |             |               |               |      |
|-----------------------------------------------------------------------------------------------------------------------------------------------------------------------------------------------------------------------------------------------------------------------------------------|---------|--------|--------------|---------------|---------------|--------------|---------------|-------------|---------------|---------------|------|
| Clinical study                                                                                                                                                                                                                                                                          | HF type | NYHA   | Patients (n) | IL-1β (pg/ml) | IL-2R (ng/ml) | IL-6 (pg/ml) | IL-10 (pg/ml) | TNF (pg/ml) | TNFR1 (ng/ml) | TNFR2 (ng/ml) | Ref. |
| Ahmed                                                                                                                                                                                                                                                                                   | HHD     | II–III | (50) 53      |               |               |              |               |             |               |               | [29] |
| Alla                                                                                                                                                                                                                                                                                    | Various | III–IV | (92) 239     |               |               |              |               |             |               |               | [43] |
| Altieri                                                                                                                                                                                                                                                                                 | Various | I–IV   | (51) 52      |               |               |              |               |             |               |               | [51] |
| Aukrust                                                                                                                                                                                                                                                                                 | Various | II–IV  | (21) 38      | (0.5) 1.2     |               | (5) 25       | (1.3) 3.0     | (5) 13      | (1) 2         | (2.5) 4.5     | [9]  |
| Deswal                                                                                                                                                                                                                                                                                  | Various | III–IV | (0) 1169     |               |               | (N/A) 7.3    |               | (N/A) 6.7   | (N/A) 13.3    | (N/A) 5.2     | [12] |
| Dibbs                                                                                                                                                                                                                                                                                   | Various | III    | (10) 10      |               |               | (2.5) 6.0    |               | (3.0) 7.0   | (0.8) 1.4     | (2.5) 4       | [10] |
| Dunlay                                                                                                                                                                                                                                                                                  | Various | III–IV | (0) 486      |               |               |              |               | (N/A) 3.1   |               |               | [63] |
| Ferrari                                                                                                                                                                                                                                                                                 | Various | II–IV  | (26) 37      |               |               |              |               | (14) 34     | (1.2) 3.5     | (2.2) 5.6     | [13] |
| Frantz                                                                                                                                                                                                                                                                                  | Various | I–IV   | (74) 249     |               |               |              |               | (1.1) 6.3   |               |               | [28] |
| George                                                                                                                                                                                                                                                                                  | Various | II–IV  | (30) 88      |               |               |              |               |             |               |               | [40] |
| Jordan                                                                                                                                                                                                                                                                                  | Various | I–IV   | (50) 53      |               |               |              |               |             |               |               | [41] |
| Levine                                                                                                                                                                                                                                                                                  | Various | III–IV | (33) 33      |               |               |              |               | (9) 115*    |               |               | [74] |
| Limas                                                                                                                                                                                                                                                                                   | Various | II–III | (0) 109      |               | (N/A) 11.3    |              |               |             |               |               | [56] |
| Lommi                                                                                                                                                                                                                                                                                   | Various | II–IV  | (14) 44      |               |               | (2.7) 5.3    |               | (14) 19     |               | (1.3) 1.9     | [58] |
| Lopez                                                                                                                                                                                                                                                                                   | HHD     | II–IV  | (20) 39      |               |               |              |               |             |               |               | [26] |
| Maeda                                                                                                                                                                                                                                                                                   | Various | III–IV | (0) 102      |               |               | (N/A) 15     |               | (N/A) 6.9   |               |               | [61] |
| Matsumori                                                                                                                                                                                                                                                                               | Various | I–IV   | (17) 126     | (ND) 76       |               | (ND) 137     |               | (ND) 100    |               |               | [47] |
| Mohler                                                                                                                                                                                                                                                                                  | Various | III–IV | (6) 92       |               |               | (1) 9.4      |               | (1) 5.8     |               |               | [46] |
| Munger                                                                                                                                                                                                                                                                                  | Various | II–IV  | (17) 78      |               | (539) 816     | (0.4) 75     |               | (8.7) 7.4   |               |               | [44] |
| Naito                                                                                                                                                                                                                                                                                   | Various | III–IV | (10) 110     |               |               |              |               |             |               |               | [65] |
| Niethammer                                                                                                                                                                                                                                                                              | Various | II–III | (20) 34      |               |               | (1.8) 3.8    | (0.8) 6.0     | (1.8) 2.4   | (1.0) 1.7     | (2.0) 3.5     | [64] |
| Noji                                                                                                                                                                                                                                                                                    | HCM     | I–IV   | (50) 28      |               |               |              |               |             |               |               | [27] |
| Ohtsuka                                                                                                                                                                                                                                                                                 | DCM     | II–III | (20) 71      |               |               |              |               |             |               |               | [42] |
| Radauceanu                                                                                                                                                                                                                                                                              | Various | II–IV  | (0) 1009     |               |               |              | (N/A) 1.93    |             |               |               | [45] |
| Rauchhaus                                                                                                                                                                                                                                                                               | Various | I–IV   | (0) 152      |               |               | (N/A) 13.0   |               | (N/A) 8.1   | (N/A) 1.4     | (N/A) 2.4     | [11] |
| Schwartzkopff                                                                                                                                                                                                                                                                           | DCM     | II–IV  | (43) 47      |               |               |              |               |             |               |               | [38] |
| Testa                                                                                                                                                                                                                                                                                   | Various | I–IV   | (20) 80      | (8) 15        | (3.2) 4.0     | (10) 20      |               | (3.8) 5.0   |               | (2.8) 6.0     | [48] |
| Torre-Amione                                                                                                                                                                                                                                                                            | Various | I–III  | (10) 63      |               |               | (2.0) 5.0    |               | (1.0) 3.8   |               |               | [54] |
| Tsutamoto                                                                                                                                                                                                                                                                               | Various | II–IV  | (13) 80      |               |               | (1.1) 10.5   |               | (2.8) 5.0   |               |               | [60] |
| Tziakas                                                                                                                                                                                                                                                                                 | Various | III–IV | (30) 52      |               |               |              |               | (19.9) 25.4 | (3.8) 5.2     | (4.0) 13.4    | [14] |
| Wang                                                                                                                                                                                                                                                                                    | DCM     | I–IV   | (32) 65      |               |               | (44.7) 80.6  | (40.5) 58.3   | (5.2) 10.4  |               |               | [55] |
| Wilson                                                                                                                                                                                                                                                                                  | Various | III    | (48) 24      |               |               |              |               | (ND) 6.0    | (ND) 1.7      | (ND) 24       | [37] |
| Yamaoka                                                                                                                                                                                                                                                                                 | Various | II–IV  | (31) 68      |               |               |              | (2.7) 6.1     | (2.6) 5.9   |               |               | [57] |
| Mean reported cytokine levels for control patients (in parentheses) and HF patients.                                                                                                                                                                                                    |         |        |              |               |               |              |               |             |               |               |      |
| *U/ml                                                                                                                                                                                                                                                                                   |         |        |              |               |               |              |               |             |               |               |      |
| DCM: Dilated cardiomyopathy; HCM: Hypertrophic cardiomyopathy; HF: Heart failure; HHD: Hypertensive heart disease; IL-2R: IL-2 receptor; N/A: Not applicable; ND: Nondetectable; NYHA: New York Heart Association class; Various: Various heart failure etiologies; TNFR: TNF receptor. |         |        |              |               |               |              |               |             |               |               |      |
