# Supplementary material
Source: PubMed Central journal article supplement (PMC2794436)
Supplement: NIHMS155251-supplement-2.pdf [file NIHMS155251-supplement-2.pdf]

| Supplementary Table 2: Circulating matrix metalloproteinase and tissue inhibitor concentrations in heart failure clinical studies.                                                                                                                                                                            |         |        |              |               |               |               |               |               |                |                |      |
|---------------------------------------------------------------------------------------------------------------------------------------------------------------------------------------------------------------------------------------------------------------------------------------------------------------|---------|--------|--------------|---------------|---------------|---------------|---------------|---------------|----------------|----------------|------|
| Clinical study                                                                                                                                                                                                                                                                                                | HF type | NYHA   | Patients (n) | MMP-1 (ng/ml) | MMP-8 (ng/ml) | MMP-2 (ng/ml) | MMP-9 (ng/ml) | MMP-3 (ng/ml) | TIMP-1 (ng/ml) | TIMP-2 (ng/ml) | Ref. |
| Ahmed                                                                                                                                                                                                                                                                                                         | HHD     | II–III | (50) 53      |               |               | (1383) 1286   | (13) 24       |               | (1000) 1364    | (42) 59        | [29] |
| Alla                                                                                                                                                                                                                                                                                                          | Various | III–IV | (92) 239     | (4.4) 2.4     |               |               |               |               | (828) 596      |                | [43] |
| Altieri                                                                                                                                                                                                                                                                                                       | Various | I–IV   | (51) 52      |               |               | (1016) 1393   | (35) 198      |               | (653) 810      | (33) 28        | [51] |
| Aukrust                                                                                                                                                                                                                                                                                                       | Various | II–IV  | (21) 38      |               |               |               |               |               |                |                | [9]  |
| Deswal                                                                                                                                                                                                                                                                                                        | Various | III–IV | (0) 1169     |               |               |               |               |               |                |                | [12] |
| Dibbs                                                                                                                                                                                                                                                                                                         | Various | III    | (10) 10      |               |               |               |               |               |                |                | [10] |
| Dunlay                                                                                                                                                                                                                                                                                                        | Various | III–IV | (0) 486      |               |               |               |               |               |                |                | [63] |
| Ferrari                                                                                                                                                                                                                                                                                                       | Various | II–IV  | (26) 37      |               |               |               |               |               |                |                | [13] |
| Frantz                                                                                                                                                                                                                                                                                                        | Various | I–IV   | (74) 249     |               |               |               | (62) 65       |               | (735) 1640     |                | [28] |
| George                                                                                                                                                                                                                                                                                                        | Various | II–IV  | (30) 88      |               |               | (155) 348     | (31) 44       | (31) 28       | (144) 274      |                | [40] |
| Jordan                                                                                                                                                                                                                                                                                                        | Various | I–IV   | (50) 53      | (3.5) 2.4     |               |               |               |               | (548) 1176     |                | [41] |
| Levine                                                                                                                                                                                                                                                                                                        | Various | III–IV | (33) 33      |               |               |               |               |               |                |                | [74] |
| Limas                                                                                                                                                                                                                                                                                                         | Various | II–III | (0) 109      |               |               |               |               |               |                |                | [56] |
| Lommi                                                                                                                                                                                                                                                                                                         | Various | II–IV  | (14) 44      |               |               |               |               |               |                |                | [58] |
| Lopez                                                                                                                                                                                                                                                                                                         | HHD     | II–IV  | (20) 39      | (4.8) 13.3    |               |               |               |               | (588) 1176     |                | [26] |
| Maeda                                                                                                                                                                                                                                                                                                         | Various | III–IV | (0) 102      |               |               |               |               |               |                |                | [61] |
| Matsumori                                                                                                                                                                                                                                                                                                     | Various | I–IV   | (17) 126     |               |               |               |               |               |                |                | [47] |
| Mohler                                                                                                                                                                                                                                                                                                        | Various | III–IV | (6) 92       |               |               |               |               |               |                |                | [46] |
| Munger                                                                                                                                                                                                                                                                                                        | Various | II–IV  | (17) 78      |               |               |               |               |               |                |                | [44] |
| Naito                                                                                                                                                                                                                                                                                                         | Various | III–IV | (10) 110     | (2.0) 10      |               | (700) 1150    |               |               |                |                | [65] |
| Niethammer                                                                                                                                                                                                                                                                                                    | Various | II–III | (20) 34      |               |               |               |               |               |                |                | [64] |
| Noji                                                                                                                                                                                                                                                                                                          | HCM     | I–IV   | (50) 28      |               |               | (780) 1000    |               |               | (110) 160      | (30) 40        | [27] |
| Ohtsuka                                                                                                                                                                                                                                                                                                       | DCM     | II–III | (20) 71      |               |               | (351) 646     | (384) 744     | (20) 65       |                |                | [42] |
| Radauceanu                                                                                                                                                                                                                                                                                                    | Various | II–IV  | (0) 1009     | (N/A) 9.8     |               |               |               |               | (N/A) 1478     |                | [45] |
| Rauchhaus                                                                                                                                                                                                                                                                                                     | Various | I–IV   | (0) 152      |               |               |               |               |               |                |                | [11] |
| Schwartzkopff                                                                                                                                                                                                                                                                                                 | DCM     | II–IV  | (43) 47      | (2.2) 5.3     |               |               |               |               | (182) 207      |                | [38] |
| Testa                                                                                                                                                                                                                                                                                                         | Various | I–IV   | (20) 80      |               |               |               |               |               |                |                | [48] |
| Torre-Amione                                                                                                                                                                                                                                                                                                  | Various | I–III  | (10) 63      |               |               |               |               |               |                |                | [54] |
| Tsutamoto                                                                                                                                                                                                                                                                                                     | Various | II–IV  | (13) 80      |               |               |               |               |               |                |                | [60] |
| Tziakas                                                                                                                                                                                                                                                                                                       | Various | III–IV | (30) 52      |               |               |               |               |               |                |                | [14] |
| Wang                                                                                                                                                                                                                                                                                                          | DCM     | I–IV   | (32) 65      |               |               |               |               |               |                |                | [55] |
| Wilson                                                                                                                                                                                                                                                                                                        | Various | III    | (48) 24      |               | (16) 9.5      | (352) 360     | (25) 75       |               | (1375) 2015    | (185) 63       | [37] |
| Yamaoka                                                                                                                                                                                                                                                                                                       | Various | II–IV  | (31) 68      |               |               |               |               |               |                |                | [57] |
| Mean reported MMP levels for control patients (in parentheses) and HF patients.                                                                                                                                                                                                                               |         |        |              |               |               |               |               |               |                |                |      |
| DCM: Dilated cardiomyopathy; HCM: Hypertrophic cardiomyopathy; HF: Heart failure; HHD: Hypertensive heart disease; MMP: Matrix metalloproteinase; N/A: Not applicable; NYHA: New York Heart Association class; TIMP: Tissue inhibitor of matrix metalloproteinase; Various: Various heart failure etiologies. |         |        |              |               |               |               |               |               |                |                |      |
